# Supplementary material for: Inhibitory Effects of Menadione on Helicobacter pylori Growth and Helicobacter pylori-Induced Inflammation via NF-κB Inhibition
Source: MDPI journal article supplement (doi:10.3390/ijms20051169), 2019-03-07
Supplement: s1 [file s1]

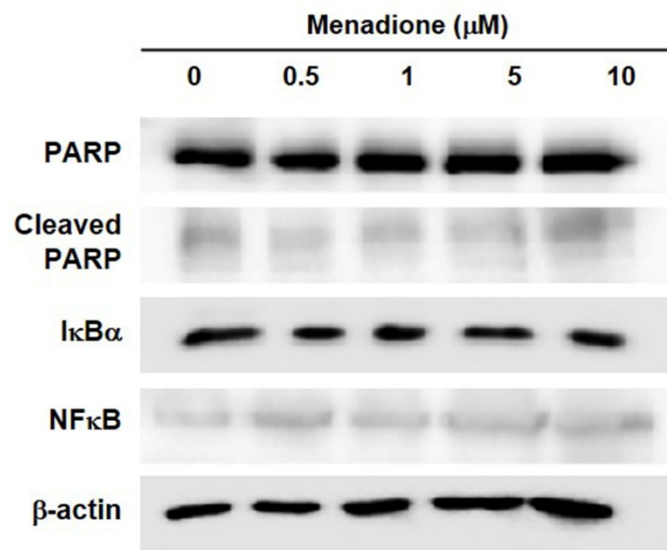

**Supplementary figure 1. Western blotting of full-length PARP, cleaved PARP, IκBα, and NF-κB in AGS cells treated with menadione.** AGS cells were treated with indicated concentrations of menadione for 12 h. After incubation, cell lysates were collected to conduct Western blotting to detect full-length PARP, cleaved PARP, IκBα, and NF-κB. β-actin was used as an internal control.
